# Supplementary material for: Valorization of Different Fractions from Butiá Pomace by Pyrolysis: H2 Generation and Use of the Biochars for CO2 Capture
Source: MDPI journal article supplement (doi:10.3390/molecules27217515), 2022-11-03
Supplement: s1 [file s1]

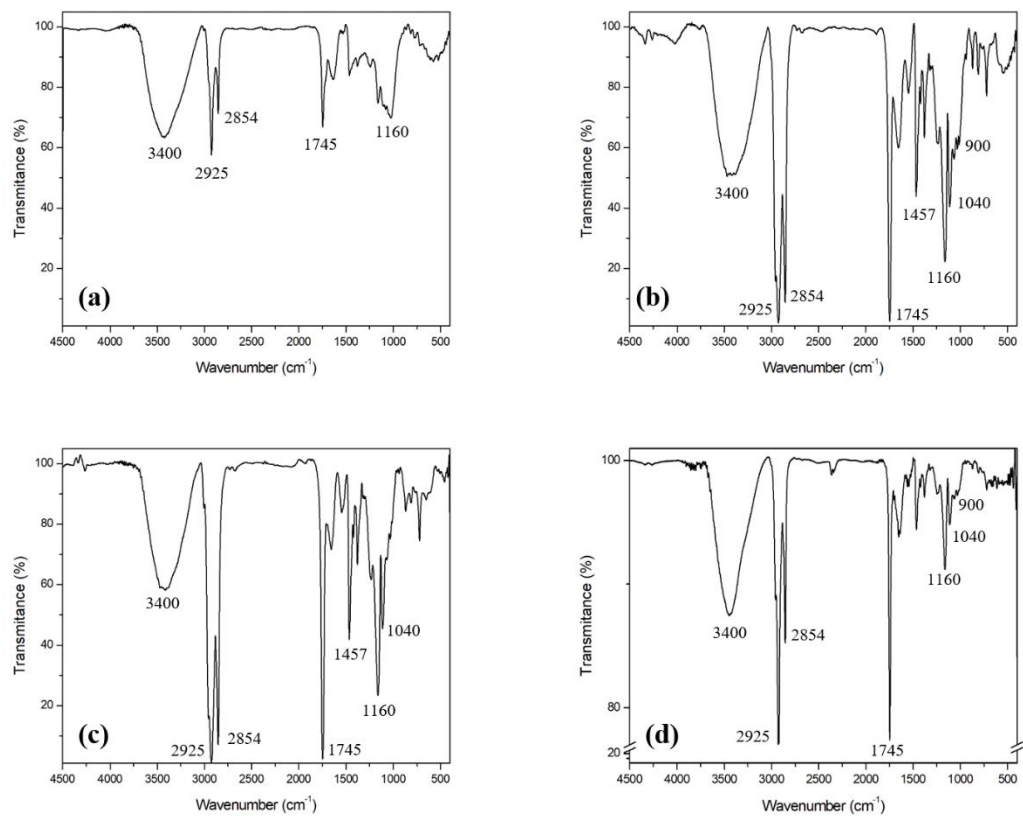

**Figure S1.** FTIR vibration spectra of butiá precursors (a) FIB, (b) ALM, (c) END, and (d) DOA.

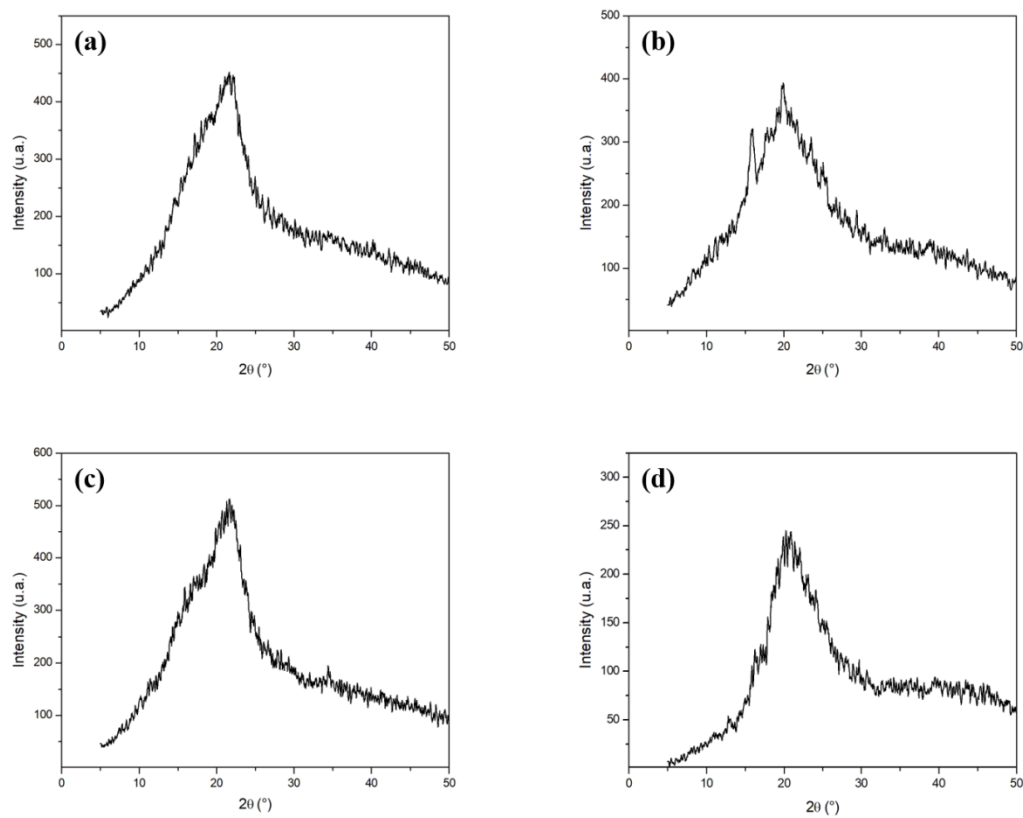

**Figure S2.** XRD patterns of butiá precursors (a) FIB, (b) ALM, (c) END, and (d) DOA.

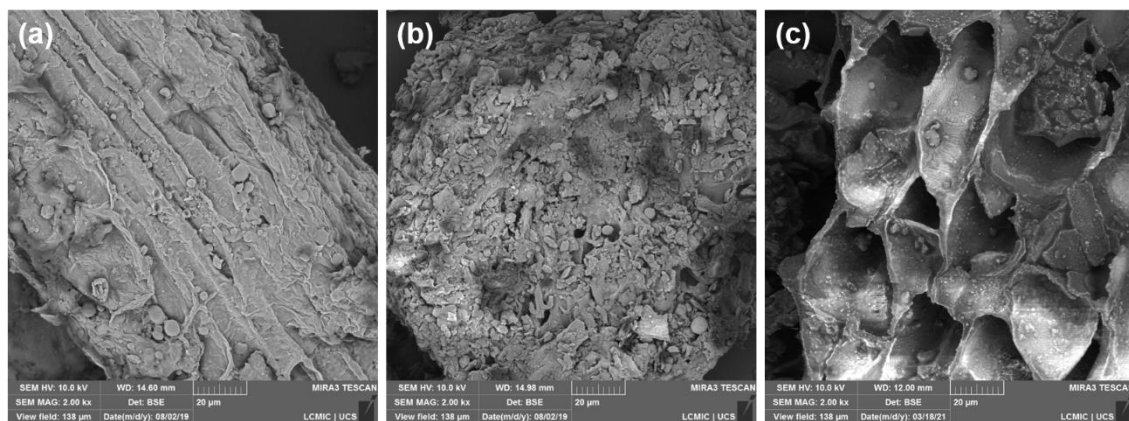

**Figure S3.** SEM micrographs of butiá precursors (a) FIB, (b) END and (c) DOA.

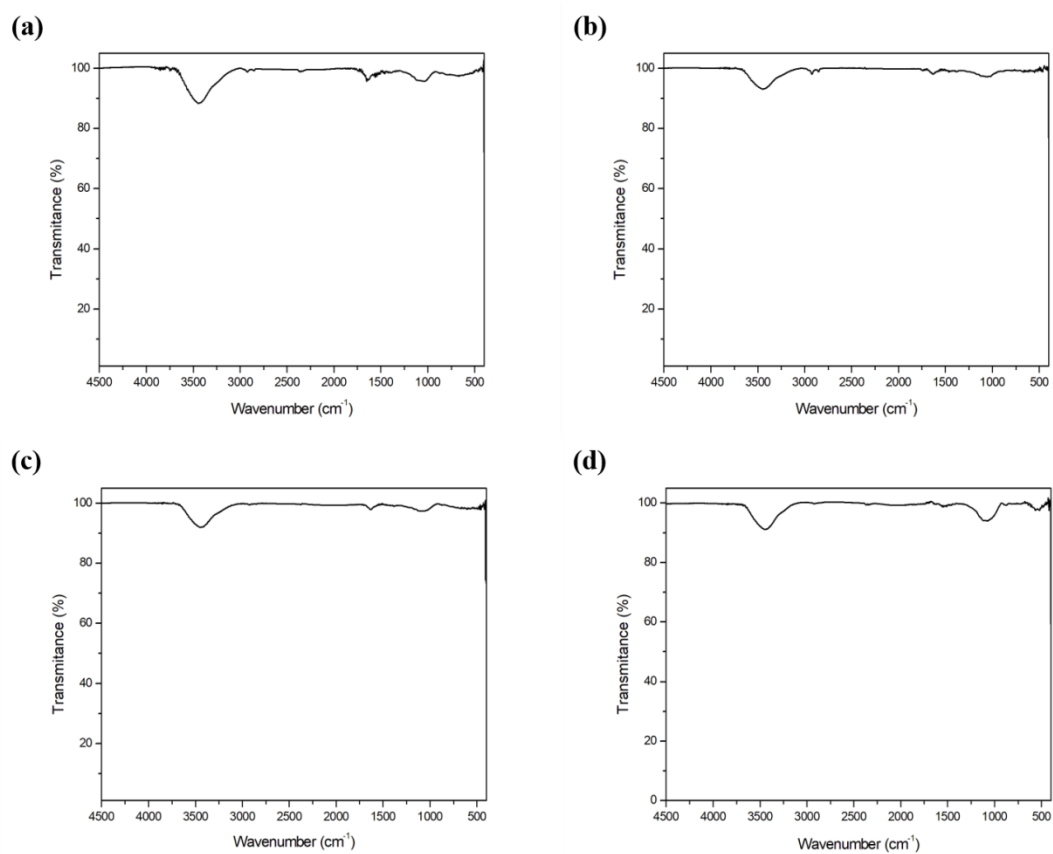

**Figure S4.** FTIR vibrational spectra of biochars (a) FIB.700, (b) ALM.700, (c) END.700 and (d) DOA.700.

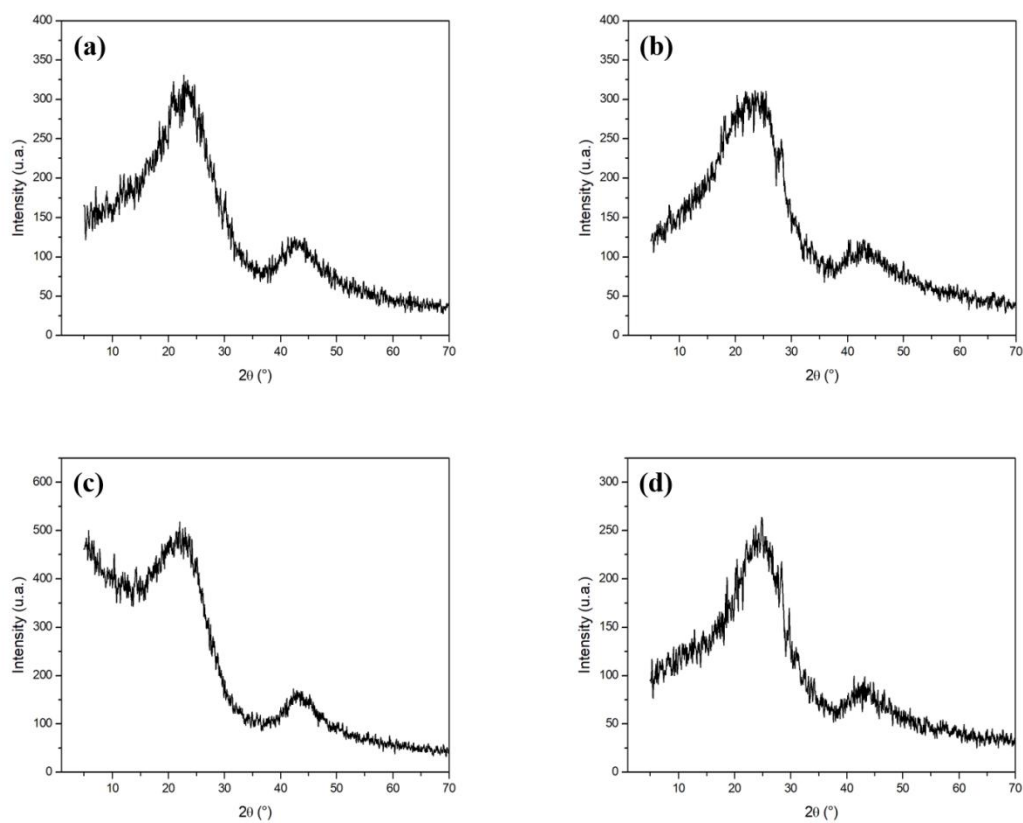

**Figure S5.** XRD patterns of biochars (a) FIB.700, (b) ALM.700, (c) END.700 and (d) DOA.700.

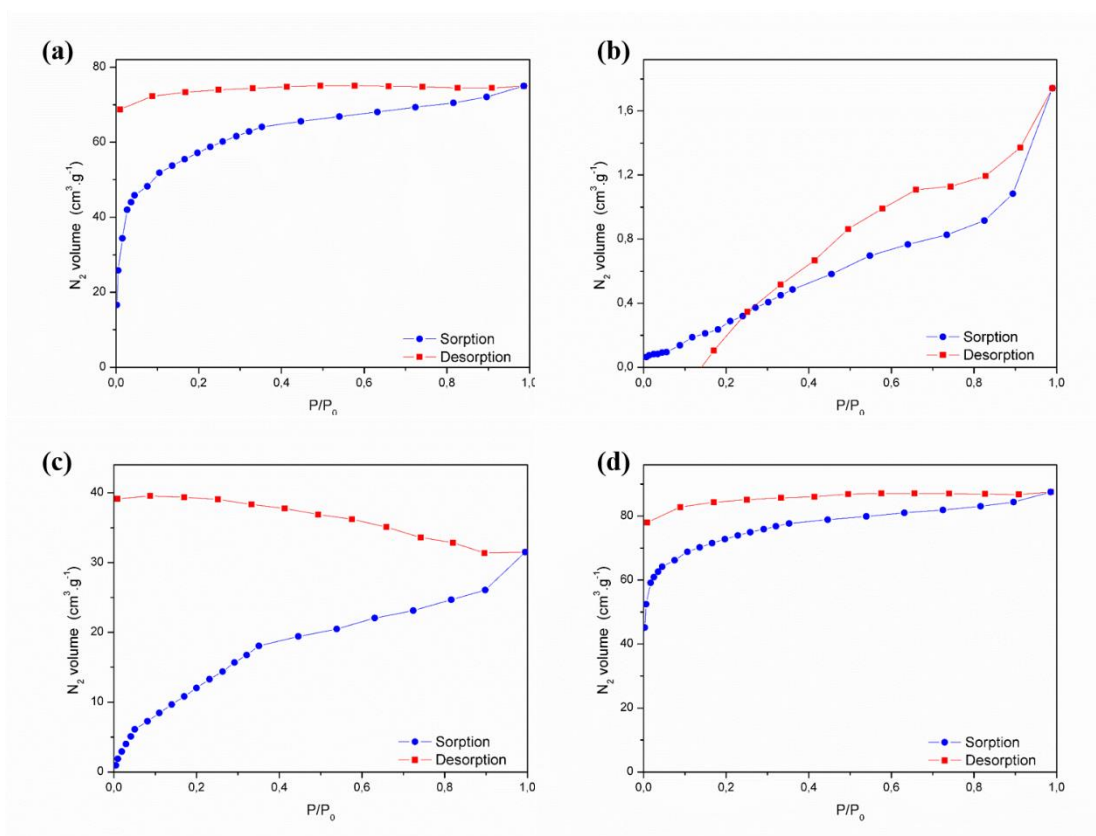

**Figure S6.** N<sub>2</sub> sorption/desorption isotherms of biochars (a) FIB.700, (b) ALM.700, (c) END.700 and (d) DOA.700.

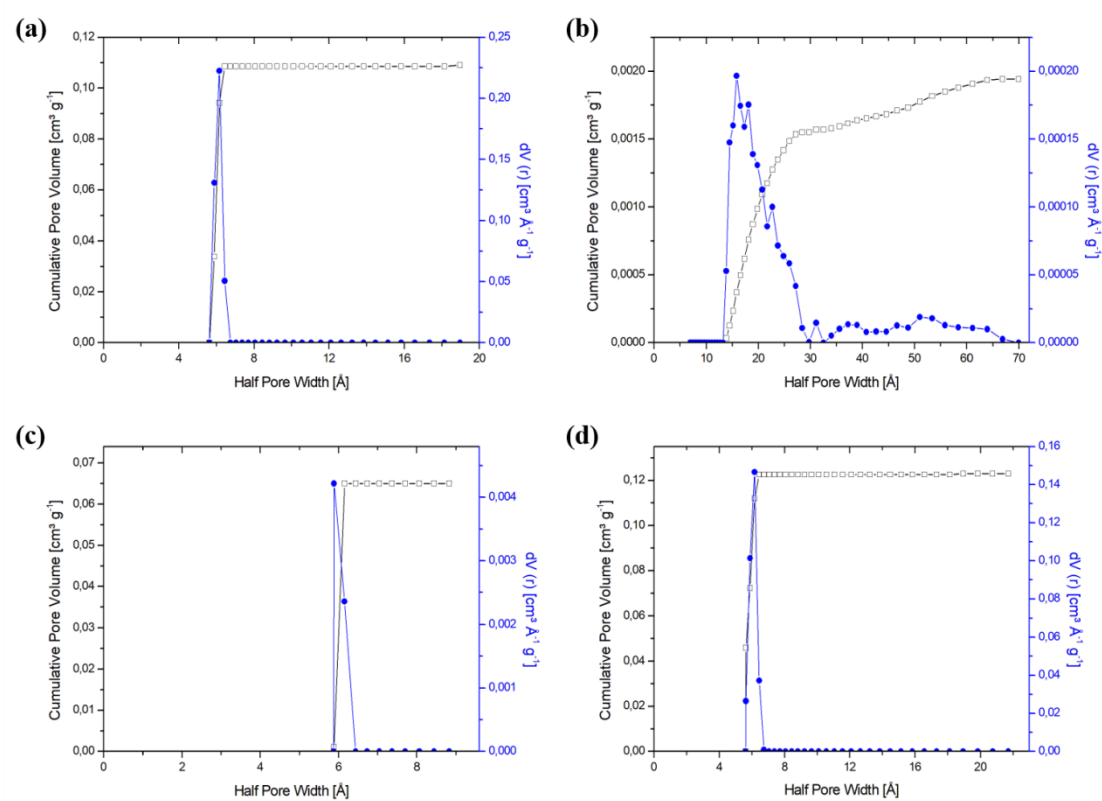

**Figure S7.** Pore size distribution for biochars (a) FIB.700, (b) ALM.700, (c) END.700 and (d) DOA.700.

Table S1 Surface area, CO<sub>2</sub> adsorption capacity and activation agent from different adsorbents presented in literature

| Precursor                  | Activation        | Surface Area<br>(m <sup>2</sup> g <sup>-1</sup> ) | CO <sub>2</sub> Adsorption<br>(mg g <sup>-1</sup> ) | CO <sub>2</sub> Adsorption<br>(mg CO <sub>2</sub> m <sup>-2</sup> ) | Fonte            |
|----------------------------|-------------------|---------------------------------------------------|-----------------------------------------------------|---------------------------------------------------------------------|------------------|
| <b>ALM.700</b>             | -                 | <b>1.92</b>                                       | <b>48.87</b>                                        | <b>25.453</b>                                                       | <b>This work</b> |
| Marine shale               | -                 | 19.62                                             | 293.98                                              | 14.984                                                              | [1]              |
| Chicken manure wastes      | -                 | 4.38                                              | 47.98                                               | 10.954                                                              | [2]              |
| <i>Arundo donax</i>        | -                 | 16                                                | 87.18                                               | 5.449                                                               | [3]              |
| Chicken manure wastes      | KOH               | 22.22                                             | 85.82                                               | 3.862                                                               | [2]              |
| Palm solid waste           | -                 | 24.5                                              | 73.06                                               | 2.982                                                               | [4]              |
| Torrefied beech wood       | -                 | 36.2                                              | 70.41                                               | 1.945                                                               | [5]              |
| <b>END.700</b>             | -                 | <b>58.39</b>                                      | <b>66.43</b>                                        | <b>1.138</b>                                                        | <b>This work</b> |
| Chicken manure wastes      | HCl               | 136.75                                            | 77.02                                               | 0.563                                                               | [2]              |
| African palm shell         | KOH               | 365                                               | 193.64                                              | 0.531                                                               | [6]              |
| Kevlar carbon fibers       | CO <sub>2</sub>   | 469                                               | 224.45                                              | 0.479                                                               | [7]              |
| <i>Arundo donax</i>        | ZnCl <sub>2</sub> | 1420                                              | 498.33                                              | 0.351                                                               | [8]              |
| Pollen                     | KOH               | 232                                               | 77.89                                               | 0.336                                                               | [9]              |
| <i>Arundo donax</i>        | KOH               | 849                                               | 277.26                                              | 0.327                                                               | [3]              |
| Pomegranate peels          | KOH               | 585                                               | 180.88                                              | 0.309                                                               | [10]             |
| Palm kern activated carbon | CO <sub>2</sub>   | 167.08                                            | 50.17                                               | 0.300                                                               | [4]              |
| <b>FIB.700</b>             | -                 | <b>183.59</b>                                     | <b>54.59</b>                                        | <b>0.297</b>                                                        | <b>This work</b> |
| Macadamia nut shell        | CO <sub>2</sub>   | 425                                               | 123.23                                              | 0.290                                                               | [11]             |
| <i>Arundo donax</i>        | KOH               | 637                                               | 165.39                                              | 0.260                                                               | [3]              |
| <b>DOA.700</b>             | -                 | <b>220.43</b>                                     | <b>51.76</b>                                        | <b>0.235</b>                                                        | <b>This work</b> |
| Paulownia sawdust          | KOH               | 1643                                              | 352.08                                              | 0.214                                                               | [12]             |
| Cokes                      | KOH               | 1375                                              | 250.86                                              | 0.182                                                               | [13]             |
| Coal char                  | KOH               | 675.37                                            | 107.82                                              | 0.160                                                               | [14]             |

|                                |                                                 |         |        |       |      |
|--------------------------------|-------------------------------------------------|---------|--------|-------|------|
| African palm shells            | KOH                                             | 1890    | 277.26 | 0.147 | [6]  |
| Carrot peels                   | KOH                                             | 1379    | 183.96 | 0.133 | [10] |
| Coconut shell                  | CO <sub>2</sub>                                 | 1327    | 171.64 | 0.129 | [15] |
| Melamine-doped phenolic-resins | KOH                                             | 1196    | 154.48 | 0.129 | [16] |
| Paulownia sawdust              | KOH                                             | 1643    | 211.25 | 0.129 | [12] |
| Rice husk                      | CO <sub>2</sub>                                 | 1097    | 136.43 | 0.124 | [17] |
| Fern leaves                    | KOH                                             | 1593    | 181.32 | 0.114 | [10] |
| CCA-treated wood               | H <sub>3</sub> PO <sub>4</sub> /CO <sub>2</sub> | 773     | 83.0   | 0.107 | [18] |
| Coal char                      | KOH                                             | 1352.06 | 143.03 | 0.106 | [14] |
| Pollen                         | KOH                                             | 1460    | 150.51 | 0.103 | [9]  |
| Polyacrylonitrile              | NaOH                                            | 1020    | 96.82  | 0.095 | [19] |
| Polyacrylonitrile              | NaNH <sub>2</sub>                               | 833     | 77.02  | 0.092 | [19] |
| Beer Waste                     | Hydrothermal                                    | 622     | 57.50  | 0.092 | [20] |
| Polyacrylonitrile              | K <sub>2</sub> CO <sub>3</sub>                  | 1250    | 107.38 | 0.086 | [19] |
| Cotton Stalk                   | Al <sub>2</sub> (SO <sub>4</sub> ) <sub>3</sub> | 2695    | 186.6  | 0.069 | [21] |
| <i>Arundo donax</i>            | ZnCl <sub>2</sub>                               | 1420    | 88.02  | 0.062 | [3]  |
| Empty palm fruit bunch         | -                                               | 1080    | 49.29  | 0.046 | [22] |
| Beer Waste                     | H <sub>3</sub> PO <sub>4</sub>                  | 1073    | 35.21  | 0.033 | [20] |
| Poplar Anthers                 | KOH                                             | 3322    | 89.78  | 0.027 | [23] |
| Empty palm fruit bunch         | Hydrothermal                                    | 1163    | 29.09  | 0.025 | [22] |
| Empty palm fruit bunch         | Hydrothermal                                    | 2510    | 37.58  | 0.015 | [22] |

---



## Supplementary References

1. Du, X.; Cheng, Y.; Liu, Z.; Hou, Z.; Wu, T.; Lei, R.; Shu, C. Study on the Adsorption of CH<sub>4</sub>, CO<sub>2</sub> and Various CH<sub>4</sub>/CO<sub>2</sub> Mixture Gases on Shale. *Alexandria Eng. J.* **2020**, *59*, 5165–5178, doi:10.1016/j.aej.2020.09.046.
2. Yıldız, Z.; Kaya, N.; Topcu, Y.; Uzun, H. Pyrolysis and Optimization of Chicken Manure Wastes in Fluidized Bed Reactor: CO<sub>2</sub> Capture in Activated Bio-Chars. *Process Saf. Environ. Prot.* **2019**, *130*, 297–305, doi:10.1016/j.psep.2019.08.011.
3. Singh, G.; Kim, I.Y.; Lakhi, K.S.; Srivastava, P.; Naidu, R.; Vinu, A. Single Step Synthesis of Activated Bio-Carbons with a High Surface Area and Their Excellent CO<sub>2</sub> Adsorption Capacity. *Carbon N. Y.* **2017**, *116*, 448–455, doi:10.1016/j.carbon.2017.02.015.
4. Nasri, N.S.; Hamza, U.D.; Ismail, S.N.; Ahmed, M.M.; Mohsin, R. Assessment of Porous Carbons Derived from Sustainable Palm Solid Waste for Carbon Dioxide Capture. *J. Clean. Prod.* **2014**, *71*, 148–157, doi:10.1016/j.jclepro.2013.11.053.
5. Wedler, C.; Span, R. A Pore-Structure Dependent Kinetic Adsorption Model for Consideration in Char Conversion – Adsorption Kinetics of CO<sub>2</sub> on Biomass Chars. *Chem. Eng. Sci.* **2021**, *231*, 116281, doi:10.1016/j.ces.2020.116281.
6. Ello, A.S.; De Souza, L.K.C.; Trokourey, A.; Jaroniec, M. Coconut Shell-Based Microporous Carbons for CO<sub>2</sub> Capture. *Microporous Mesoporous Mater.* **2013**, *180*, 280–283, doi:10.1016/j.micromeso.2013.07.008.
7. Conte, G.; Stelitano, S.; Policicchio, A.; Minuto, F.D.; Lazzaroli, V.; Galiano, F.; Agostino, R.G. Assessment of Activated Carbon Fibers from Commercial Kevlar® as Nanostructured Material for Gas Storage: Effect of Activation Procedure and Adsorption of CO<sub>2</sub> and CH<sub>4</sub>. *J. Anal. Appl. Pyrolysis* **2020**, *152*, 104974, doi:10.1016/j.jaap.2020.104974.
8. Singh, G.; Kim, I.Y.; Lakhi, K.S.; Joseph, S.; Srivastava, P.; Naidu, R.; Vinu, A. Heteroatom Functionalized Activated Porous Biocarbons and Their Excellent Performance for CO<sub>2</sub> Capture at High Pressure. *J. Mater. Chem. A* **2017**, *5*, 21196–21204, doi:10.1039/c7ta07186h.
9. Choi, S.W.; Tang, J.; Pol, V.G.; Lee, K.B. Pollen-Derived Porous Carbon by KOH Activation: Effect of Physicochemical Structure on CO<sub>2</sub> Adsorption. *J. CO<sub>2</sub> Util.* **2019**, *29*, 146–155, doi:10.1016/j.jcou.2018.12.005.
10. Serafin, J.; Narkiewicz, U.; Morawski, A.W.; Wróbel, R.J.; Michalkiewicz, B. Highly Microporous Activated Carbons from Biomass for CO<sub>2</sub> Capture and Effective Micropores at Different Conditions. *J. CO<sub>2</sub> Util.* **2017**, *18*, 73–79, doi:10.1016/j.jcou.2017.01.006.
11. Bae, J.S.; Su, S. Macadamia Nut Shell-Derived Carbon Composites for Post Combustion CO<sub>2</sub> Capture. *Int. J. Greenh. Gas Control* **2013**, *19*, 174–182, doi:10.1016/j.ijggc.2013.08.013.
12. Zhu, X.L.; Wang, P.Y.; Peng, C.; Yang, J.; Yan, X. Bin Activated Carbon Produced from Paulownia Sawdust for High-Performance CO<sub>2</sub> Sorbents. *Chinese Chem. Lett.* **2014**, *25*, 929–932, doi:10.1016/j.ccllet.2014.03.039.
13. Labus, K.; Gryglewicz, S.; Machnikowski, J. Granular KOH-Activated Carbons from Coal-Based Cokes and Their CO<sub>2</sub> Adsorption Capacity. *Fuel* **2014**, *118*, 9–15, doi:10.1016/j.fuel.2013.10.042.
14. Quan, C.; Wang, H.; Jia, X.; Gao, N. Effect of Carbonization Temperature on CO<sub>2</sub> Adsorption Behavior of Activated Coal Char. *J. Energy Inst.* **2021**, *97*, 92–99, doi:10.1016/j.joei.2021.04.003.
15. Ello, A.S.; De Souza, L.K.C.; Trokourey, A.; Jaroniec, M. Development of Microporous Carbons for CO<sub>2</sub> Capture by KOH Activation of African Palm Shells. *J. CO<sub>2</sub> Util.* **2013**, *2*, 35–38, doi:10.1016/j.jcou.2013.07.003.
16. Cong, H.; Zhang, M.; Chen, Y.; Chen, K.; Hao, Y.; Zhao, Y.; Feng, L. Highly Selective CO<sub>2</sub> Capture by Nitrogen Enriched Porous Carbons. *Carbon N. Y.* **2015**, *92*, 297–304, doi:10.1016/j.carbon.2015.04.052.
17. Li, M.; Xiao, R. Preparation of a Dual Pore Structure Activated Carbon from Rice Husk Char as an Adsorbent for CO<sub>2</sub> Capture. *Fuel Process. Technol.* **2019**, *186*, 35–39, doi:10.1016/j.fuproc.2018.12.015.
18. Botomé, M.L.; Poletto, P.; Junges, J.; Perondi, D.; Dettmer, A.; Godinho, M. Preparation and Characterization of a Metal-Rich Activated Carbon from CCA-Treated Wood for CO<sub>2</sub> Capture. *Chem. Eng. J.* **2017**, *321*, 614–621, doi:10.1016/j.cej.2017.04.004.
19. Singh, J.; Basu, S.; Bhunia, H. CO<sub>2</sub> Capture by Modified Porous Carbon Adsorbents: Effect of Various Activating Agents. *J. Taiwan Inst. Chem. Eng.* **2019**, *102*, 438–447, doi:10.1016/j.jtice.2019.06.011.
20. Hao, W.; Björkman, E.; Lilliestråle, M.; Hedin, N. Activated Carbons Prepared from Hydrothermally Carbonized Waste Biomass Used as Adsorbents for CO<sub>2</sub>. *Appl. Energy* **2013**, *112*, 526–532, doi:10.1016/j.apenergy.2013.02.028.
21. Pramanik, P.; Patel, H.; Charola, S.; Neogi, S.; Maiti, S. High Surface Area Porous Carbon from Cotton Stalk Agro-Residue for CO<sub>2</sub> adsorption and Study of Techno-Economic Viability of Commercial Production. *J. CO<sub>2</sub> Util.* **2021**, *45*, 101450, doi:10.1016/j.jcou.2021.101450.
22. Parshetti, G.K.; Chowdhury, S.; Balasubramanian, R. Biomass Derived Low-Cost Microporous Adsorbents for Efficient CO<sub>2</sub> Capture. *Fuel* **2015**, *148*, 246–254, doi:10.1016/j.fuel.2015.01.032.
23. Song, J.; Shen, W.; Wang, J.; Fan, W. Superior Carbon-Based CO<sub>2</sub> Adsorbents Prepared from Poplar Anthers. *Carbon N. Y.* **2014**, *69*, 255–263, doi:10.1016/j.carbon.2013.12.024.
